# Supplementary material for: Tryptic digestion of human serum for proteomic mass spectrometry automated by centrifugal microfluidics
Source: Royal Society of Chemistry journal article supplement (doi:10.1039/d0lc00530d), 2020-01-01
Supplement: d0lc00530d1.pdf [file d0lc00530d1.pdf]

## Supplementary Information

### 1 Evaluation of metering performance

A slightly modified microfluidic chip was designed and fabricated to determine the reproducibility of the metering structures. The microfluidic layout of the metering sectors on the disk mirrors the digestion sectors' layout, except for some alterations, to be able to precisely determine the amount of liquid metered by each of the four metering structures, M1-M4. Metering performance for sample and UT-buffer can be evaluated with the metering structures M1 & M2 in combination with the evaluation channels C1 & C2. As can be seen in Figure 1 the upstream fluidic of the metering structures is identical to the layout in the digestion sector. Instead of a dilution chamber, two measurement channels C1 & C2 are connected to the metering structures. This design allows the metered fluid to fill the channel, and observation of the meniscus with a stroboscopic setup makes it possible to determine the metered volume with high accuracy.

The same approach was used to evaluate the amount of metered dilution (M3), trypsin and acetic acid. The metering structure M4 was used for both trypsin and acetic acid metering.

For the determination of the metering accuracy, each reagent was metered in its respective metering structure on three different disks. After metering, the liquid was centrifuged into evaluation channels and the height of the meniscus in the channel was monitored with a stroboscopic setup at 30 Hz. At this high rotational frequency, capillary forces acting on the meniscus become negligible compared to the centrifugal forces. Thus, the resulting meniscus of the liquid column in the microfluidic channels is flat, which facilitates exact determination of the liquid volume. For final quantitation of the metered volume, the stroboscopic images were imported into Solidworks and aligned with the CAD structure of the evaluation channels. The channel geometry was then trimmed at the position of the meniscus and the remaining volume was measured. To minimize the influence of variations during the production process on the obtained volumes, the dimensions of all metering structures were measured at three different positions in the PDM cast with a Confovis DUO Vario microscope (*confovis GmbH, Germany*). Measurement results are presented in Table 1 and were used as the dimensions of the CAD structures the stroboscopic images were aligned to. The disks were manufactured by thermoforming coextruded COC 6013/8007 foils with a thickness of 200µm. As the glass transition temperature of the 6013 layer (135°C) is 25°C higher

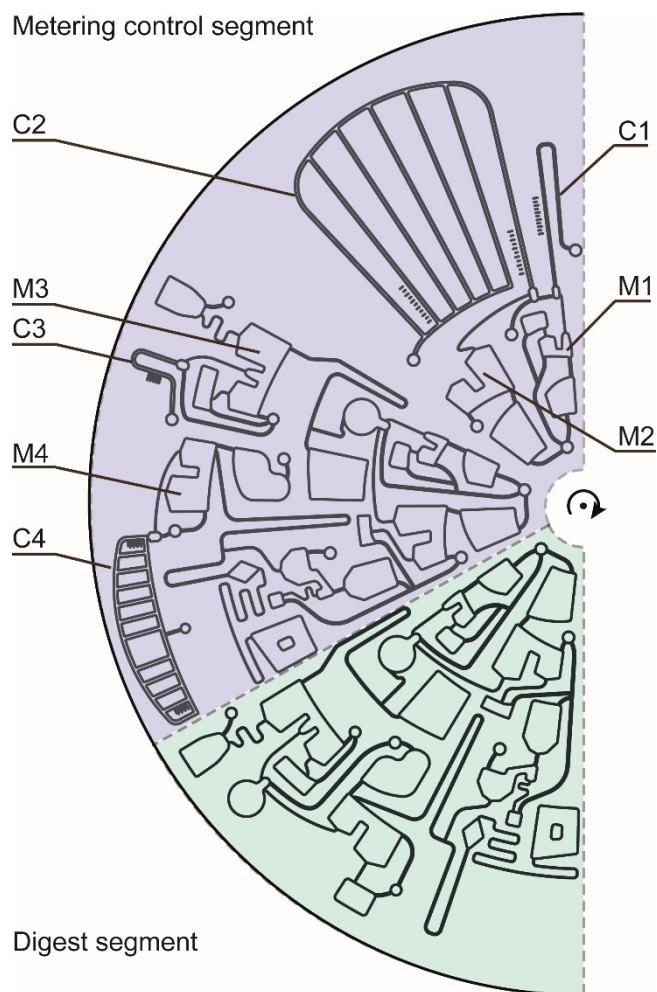

Figure 1: One half of the microfluidic disk showing the principal layout of one sector for the digestion of serum as well as the metering control segment which allows to determine how precisely reagents and sample are metered in the different structures.

than the highest process temperature during the thermoforming process, the contour accuracy of the foil disks was assumed to be high and reproducible.

Table 1: Dimensions of the metering structures in the PDMS cast

| Structure | Width             | Height             |
|-----------|-------------------|--------------------|
| C1        | 279.1 µm ± 5.5 µm | 208.6 µm ± 0.45 µm |
| C2        | 403.6 µm ± 3.3 µm | 316.0 µm ± 0.6 µm  |
| C3        | 403.4µm ± 1.3 µm  | 311.3 µm ± 2.4 µm  |
| C4        | 466.8 µm ± 5.2 µm | 369.3 µm ± 0.4µm   |

## Supplementary Information

### Table 2: LC-MS/MS parameters

#### Reversed phase liquid chromatography (RPLC)

|                         |                                                                                                                                             |
|-------------------------|---------------------------------------------------------------------------------------------------------------------------------------------|
| Instrument              | Ultimate 3000 RSLC (Thermo Scientific)                                                                                                      |
| Trap column             | Acclaim PepMap100 (Thermo Scientific)<br>75 $\mu\text{m}$ inner diameter, packed with 3 $\mu\text{m}$ C18 particles                         |
| Analytical column       | Accucore 150-C18 (Thermo Fischer Scientific)<br>25 cm x 75 $\mu\text{m}$ , 2.6 $\mu\text{m}$ C18 particles, 150 $\text{\AA}$ pore size      |
| Flow rate               | 300 nl/min                                                                                                                                  |
| Column oven temperature | 50°C                                                                                                                                        |
| Buffer system           | Binary buffer system consisting of 0.1% acetic acid in HPLC-grade water (buffer A) and 100% ACN in 0.1% acetic acid (buffer B)              |
| Gradient                | Gradient of buffer B: 2 min 2% to 5%, 8 min 5%, 120 min 5% to 25%, 5 min 20 to 40%, 2 min 40% to 90%, 5 min 90%, 3 min 90% to 2%, 10 min 2% |

#### Mass spectrometry (MS)

|                                                |                                                                             |
|------------------------------------------------|-----------------------------------------------------------------------------|
| Instrument                                     | Q Exactive HF (Thermo Scientific)                                           |
| Operation mode                                 | Data-dependent                                                              |
| Electrospray                                   | Nanospray Flex Ion Source                                                   |
| <b>Full MS</b>                                 |                                                                             |
| MS scan resolution                             | 60,000                                                                      |
| AGC target                                     | 3e6                                                                         |
| Maximum ion injection time for the MS scan     | 20 ms                                                                       |
| Scan range                                     | 333 to 1650 m/z                                                             |
| Spectra data type                              | Profile                                                                     |
| <b>dd-MS2</b>                                  |                                                                             |
| Resolution                                     | 15,000                                                                      |
| MS/MS AGC target                               | 1e5                                                                         |
| Maximum ion injecting time for the MS/MS scans | 25 ms                                                                       |
| Spectra data type                              | Profile                                                                     |
| SelectioB for MS/MS                            | 15 most abundant isotope patterns with charge $\geq 2$ from the survey scan |
| Isolation window                               | 1.4 m/z                                                                     |
| Dissociation mode                              | HCD                                                                         |
| Normalized collision energy                    | 27.5%                                                                       |
| Dynamic exclusion                              | 30 s                                                                        |
| Charge exclusion                               | Unassigned, 1, >6                                                           |

## Supplementary Information

**Table 3: Frequency and temperature protocol**

| Step number | Description                                                            | Duration [s] | Frequency [Hz] | Acceleration [Hz/s] | Temperature [°C] |
|-------------|------------------------------------------------------------------------|--------------|----------------|---------------------|------------------|
| 1           | Metering and transfer                                                  | 65           | 75             | 30                  | -                |
| 2           | Relax pressure in timer pneumatics                                     | 120          | 25             | 1                   | -                |
| 3           | Lower shakemode frequency                                              | 0.1          | 7              | 30                  | -                |
| 4           | Upper shakemode frequency                                              | 0.3          | 15             | 30                  | -                |
| 5           | Repeat steps 4 & 5 80 times                                            |              |                |                     |                  |
| 6           | Denaturation                                                           | 300          | 25             | 30                  | -                |
| 7           | Build up pressure in pneumatic chamber                                 | 45           | 60             | 30                  | -                |
| 8           | Prime siphon                                                           | 0.5          | 20             | 30                  | -                |
| 9           | Transfer of dilution                                                   | 5            | 40             | 30                  | -                |
| 10          | Metering and transfer of dilution                                      | 60           | 60             | 30                  | -                |
| 11          | Lower shakemode frequency                                              | 0,1          | 2              | 30                  | -                |
| 12          | Upper shakemode frequency                                              | 0,1          | 15             | 30                  | -                |
| 13          | Repeat steps 11 & 12 12 times                                          |              |                |                     |                  |
| 14          | Reload timer                                                           | 45           | 60             | 30                  | -                |
| 15          | Repeat steps 11 & 12 12 times                                          |              |                |                     |                  |
| 16          | Relax pressure in timer pneumatics without priming the adjacent siphon | 150          | 25             | 30                  | -                |
| 17          | Digestion                                                              | 61200        | 30             | 30                  | 37               |
| 18          | Decrease temperature                                                   | 10           | 30             | 30                  | 22               |
| 19          | Build up pressure in timer pneumatic                                   | 3            | 60             | 30                  | -                |
| 20          | Prime siphon of timer structure                                        | 75           | 12             | 30                  | -                |
| 21          | Metering and transfer of acetic acid                                   | 50           | 60             | 30                  | -                |
| 22          | Upper shakemode frequency                                              | 0,1          | 15             | 30                  | -                |
| 23          | Lower shakemode frequency                                              | 0,1          | -15            | 30                  | -                |
| 24          | Repeat steps 22 & 23 30 times                                          |              |                |                     |                  |
| 25          | Centrifugation                                                         | 5            | 30             | 30                  | -                |
